# Supplementary material for: In situ loading of ultra-small Cu2O particles on TiO2 nanosheets to enhance the visible-light photoactivity
Source: Royal Society of Chemistry journal article supplement (doi:10.1039/c2nr31859h), 2012-01-01
Supplement: c2nr31859h.pdf [file c2nr31859h.pdf]

## Supporting information

### **In-situ loading of ultra-small Cu<sub>2</sub>O particles on TiO<sub>2</sub> nanosheets to enhance the visible-light photoactivity**

Lichen Liu,<sup>a,b</sup> Xianrui Gu<sup>a,b</sup> Chuanzhi Sun,<sup>c</sup> Hao Li,<sup>a,c</sup> Yu Deng,<sup>b\*</sup> Fei Gao,<sup>b\*</sup> Lin  
Dong<sup>a,b\*</sup>

<sup>a</sup> Key Laboratory of Mesoscopic Chemistry of Ministry of Education, School of Chemistry and Chemical Engineering, Nanjing University, Nanjing 210093, PR China

<sup>b</sup> Jiangsu Key Laboratory of Vehicle Emissions Control, Center of Modern Analysis, Nanjing University, Nanjing 210093, PR China

<sup>c</sup> Department of Chemistry, Chemical Engineering and Materials Science, Shandong Normal University, Jinan 250014, PR China

**\* To whom correspondence should be addressed.**

Tel.: +86 25 83592290; fax: +86 25 83317761.

E-mail address: [dengyu@nju.edu.cn](mailto:dengyu@nju.edu.cn) (Yu Deng)

E-mail address: [gaofei@nju.edu.cn](mailto:gaofei@nju.edu.cn) (Fei Gao)

E-mail address: [donglin@nju.edu.cn](mailto:donglin@nju.edu.cn) (Lin Dong)

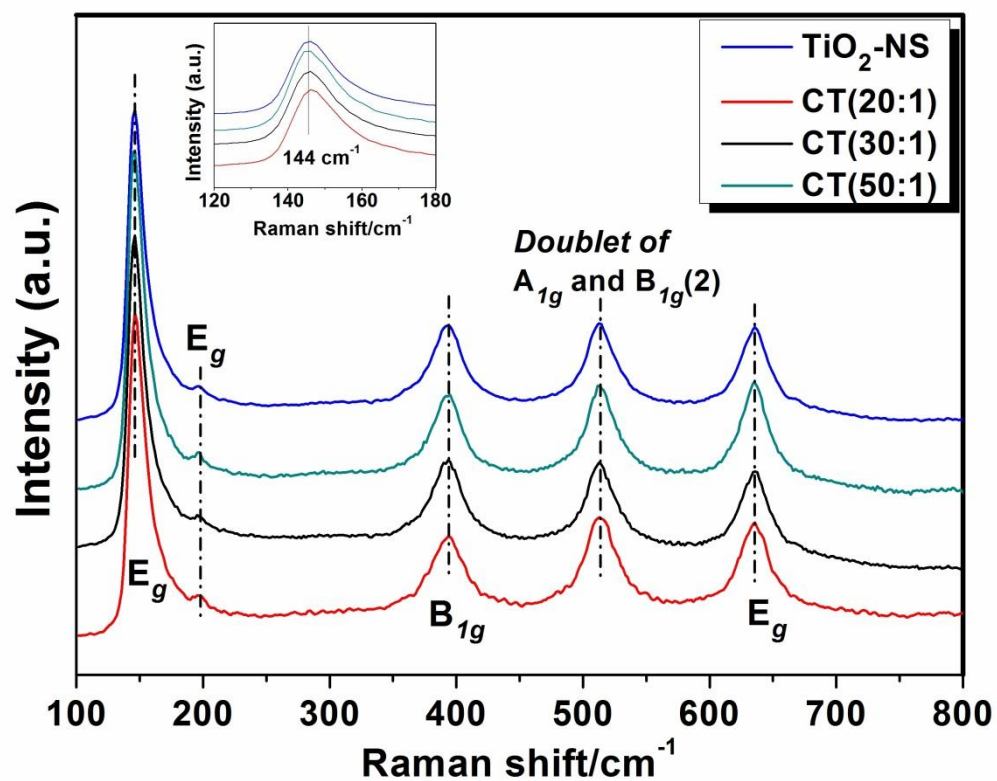

**Fig. S1** Raman spectra of pure  $\text{TiO}_2$  nanosheets ( $\text{TiO}_2\text{-NS}$ ) and  $\text{Cu}_2\text{O}/\text{TiO}_2$  nanosheets (CT nanosheets).

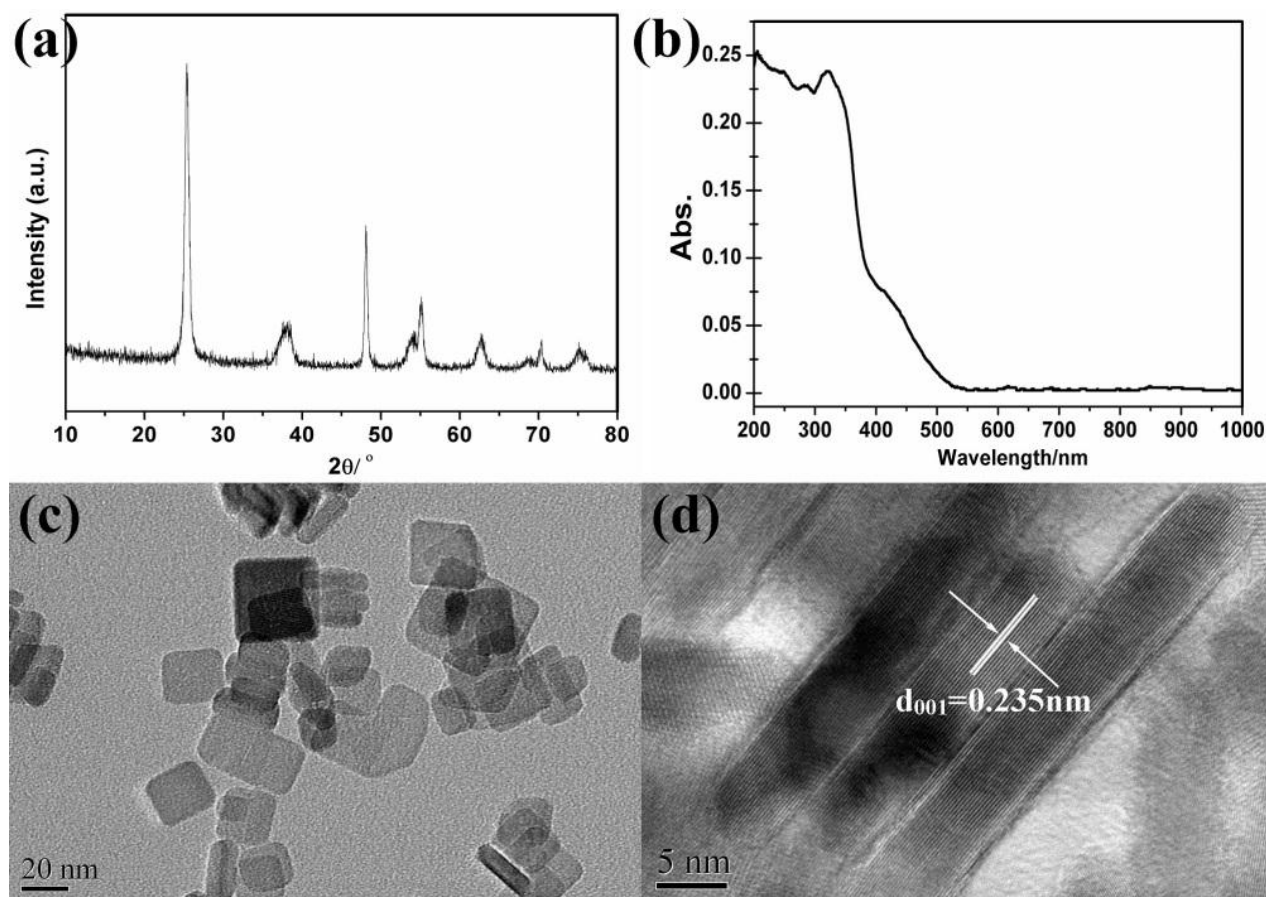

**Fig. S2** Structural and morphological characterizations of N-doped TiO<sub>2</sub> nanosheets with {001} facets exposed. (a) XRD pattern, (b) UV-vis diffuse reflectance spectra, (c-d) TEM images.

The XRD pattern of N-doped TiO<sub>2</sub> nanosheets (N-TiO<sub>2</sub>-NS) shows typical diffraction pattern of anatase (Fig.S2a), indicating they have the same crystal structure with TiO<sub>2</sub>-NS and CT-NS. The UV-vis spectrum of N-TiO<sub>2</sub>-NS is displayed in Fig. S2b. Obviously, the N-doped sample shows an enhanced absorption in 400~500 nm compared to pure TiO<sub>2</sub> nanosheets, which can be ascribed to the N-doping.

We use TEM to investigate the morphology of N-TiO<sub>2</sub>-NS. In Fig. S2c, these N-doped TiO<sub>2</sub> nanosheets are rectangular nanosheets with side length of ca. 20~50 nm and thickness of ca. 4~10 nm. The HRTEM image Fig. S2d shows that the lattice spacing parallel to the top and bottom facets is ~0.235nm, corresponding to the {001} planes of anatase TiO<sub>2</sub>. The morphology of N-TiO<sub>2</sub>-NS is quite similar to that of TiO<sub>2</sub>-NS and CT-NS, indicating that N-TiO<sub>2</sub>-NS is a suitable visible-light catalyst for comparison to confirm the improvement in visible-light activity introduced by loading Cu<sub>2</sub>O nanoparticles.
